# Supplementary material for: Exploring the Effects of Climate Change on Farming System Choice: A Farm-Level Space-for-Time Approach
Source: MDPI journal article supplement (doi:10.3390/land12122113), 2023-11-27
Supplement: s1 [file s1]

## Supplementary information

for

# Exploring the effects of climate change on farming system choice: a farm-level space-for-time approach

Paulo Flores Ribeiro, José Lima Santos

**Table S1.** The farming systems of Alentejo, Portugal, in 2017 (adapted from [16]). Figures in brackets describe the livestock density, in livestock units per hectare of total agricultural area. Colours provide a legend for Figure 2. For a detailed description of farming systems see reference [16] in the manuscript

|                                                                                     |                                                                                                                                                                                                                        |
|-------------------------------------------------------------------------------------|------------------------------------------------------------------------------------------------------------------------------------------------------------------------------------------------------------------------|
|    | Cattle grazing - CO: a low intensive agroforestry system, where farmland is mostly composed of permanent pastures under the canopy of scattered trees, mostly cork oak (CO), grazed by low-density cattle herds (0.78) |
|   | Cattle grazing - HO: similar to the previous FS but with holm oak (HO) replacing cork oak and slightly lower livestock density (0.68)                                                                                  |
|  | Cattle grazing – forages: a low-intensity system with farmland mostly composed by pastures, and rainfed forages and cereals. Higher livestock density, mostly cattle (0.97)                                            |
|  | Grazing goats: a low intensive agroforestry system, dominated by permanent pastures under the canopy of cork and holm oaks (1.04 <sup>1</sup> )                                                                        |
|  | Mixed Cattle and sheep - Irrigated forages: mostly composed by irrigated forages, and rainfed permanent pastures and forages. Livestock includes both cattle and sheep (0.62)                                          |
|  | Sheep grazing - CO: similar to Cattle grazing - CO but with livestock mostly composed by sheep instead of cattle (0.25)                                                                                                |
|  | Sheep grazing - HO: similar to Cattle grazing - HO but with livestock mostly composed by sheep instead of cattle (0.39)                                                                                                |
|  | Sheep grazing - pastures: low intensive system dominated by rainfed permanent pastures grazed by sheep (1.00), with few or no trees                                                                                    |
|  | Sheep grazing - pastures and forages: mostly composed by permanent pastures (no trees), but including olive groves, and rainfed cereals and forages. Livestock dominated by sheep but may include some goats (0.71)    |
|  | Sheep grazing - forages: mostly composed by forages, but also including permanent pastures and olive groves. Livestock dominated by grazing sheep, but possibly including goats (0.38)                                 |
|  | Rainfed olive groves with sheep: olive groves dominate, with some pastures grazed by sheep (1.21)                                                                                                                      |
|  | Rainfed olive groves: a permanent crop system largely dominated by rainfed olive groves. No livestock (n.e. <sup>2</sup> )                                                                                             |
|  | Irrigated olive groves: a permanent and intensive crop system, massively occupied by olive groves irrigated by public irrigation systems (n.e.)                                                                        |
|  | Vineyards: a permanent and intensive crop system dominated by vineyards but also including rainfed olive groves, pastures, and fallows (n.e.)                                                                          |
|  | Fruit trees: a permanent and intensive crop system composed mostly by fruit trees, but also with pastures under cork and holm oaks (n.e.)                                                                              |
|  | Stone pine: a permanent and intensive crop system massively occupied by Stone pines, but with relevant pasture area under cork and holm oaks (n.e.)                                                                    |

|                                                                                   |                                                                                                                                                                                                    |
|-----------------------------------------------------------------------------------|----------------------------------------------------------------------------------------------------------------------------------------------------------------------------------------------------|
|  | Rice: an annual and intensive monoculture system, often depending on public irrigation systems (n.e.)                                                                                              |
|  | Irrigated cereals and horticultural crops: an annual and very intensive crop system, composed by cereals, horticultural, and industrial horticulture irrigated by public irrigation systems (n.e.) |
|  | Rainfed cereals and oilseeds: an annual and extensive crop system, composed by rainfed cereals and irrigated oilseeds (n.e.)                                                                       |
|  | Rainfed cereals: an annual and extensive crop system, including autumn-winter crops, fallows, pastures and rainfed olive groves (n.e.)                                                             |
|  | Pastures (no livestock): a very extensive system dominated by pastures, occasionally including also small areas of rainfed olive groves, but without any livestock declared (n.e.)                 |
|  | Fallows: extensive system represented by small farms that were under fallow in 2017 (n.e.)                                                                                                         |

<sup>1</sup> The livestock density in this FS is likely overestimated because goats often graze outside the farm's area

<sup>2</sup> The livestock density in this and subsequent FS is virtually zero, so it is marked "n.e." (non-existent)

## Transition matrices

The next pages present transition matrices for areal changes of farming systems from 2017 to 2081-2100 in three climate change scenarios in the Alentejo region, Portugal:

- Low emission scenario (SSP 1-2.6)
- Moderate emission scenario (SSP 3-7.0)
- High emission scenario (SSP 5-8.5)

Values are presented in relative terms (proportions).

Values below 0.01 are omitted.

# Low emission scenario (SSP 1-2.6)

| From \ To                                  | Cattle grazing - forages | Cattle grazing - HO | Cattle grazing - CO | Fallows | Fruit trees | Grazing goats | Irrigated cereals and horticultural crops | Irrigated olive groves | Mixed Cattle and sheep - Irrigated forages | Pastures without livestock | Rainfed cereals | Rainfed cereals and oilseeds | Rainfed olive groves | Rainfed olive groves with sheep | Rice | Sheep grazing - forages | Sheep grazing - pastures | Sheep grazing - pastures and forages | Sheep grazing - HO | Sheep grazing - CO | Stone pine | Vineyards |
|--------------------------------------------|--------------------------|---------------------|---------------------|---------|-------------|---------------|-------------------------------------------|------------------------|--------------------------------------------|----------------------------|-----------------|------------------------------|----------------------|---------------------------------|------|-------------------------|--------------------------|--------------------------------------|--------------------|--------------------|------------|-----------|
| Cattle grazing - forages                   | 0.84                     | 0.15                |                     |         |             |               |                                           |                        |                                            |                            |                 |                              |                      |                                 |      |                         |                          |                                      |                    |                    |            |           |
| Cattle grazing - HO                        |                          | 0.98                |                     |         |             |               |                                           |                        |                                            |                            |                 |                              |                      |                                 |      |                         |                          |                                      |                    |                    |            |           |
| Cattle grazing - CO                        | 0.01                     | 0.31                | 0.66                |         |             |               |                                           |                        |                                            |                            |                 |                              |                      |                                 |      |                         |                          |                                      |                    |                    |            |           |
| Fallows                                    | 0.04                     | 0.07                |                     | 0.71    |             |               |                                           | 0.03                   |                                            |                            | 0.02            | 0.01                         |                      |                                 |      |                         |                          |                                      | 0.06               |                    | 0.03       |           |
| Fruit trees                                |                          |                     |                     |         | 0.83        | 0.01          |                                           |                        |                                            |                            |                 |                              |                      | 0.02                            |      |                         | 0.02                     |                                      | 0.02               | 0.02               | 0.01       |           |
| Grazing goats                              |                          | 0.15                | 0.02                |         |             | 0.64          |                                           |                        |                                            |                            |                 |                              |                      |                                 |      |                         | 0.02                     |                                      | 0.12               | 0.03               | 0.02       |           |
| Irrigated cereals and horticultural crops  | 0.02                     |                     | 0.01                |         |             |               | 0.84                                      | 0.05                   | 0.01                                       |                            |                 | 0.03                         |                      |                                 |      |                         |                          |                                      |                    |                    | 0.01       |           |
| Irrigated olive groves                     | 0.02                     | 0.04                |                     |         |             |               |                                           | 0.89                   |                                            |                            |                 | 0.02                         |                      |                                 |      |                         |                          |                                      |                    |                    |            |           |
| Mixed Cattle and sheep - Irrigated forages |                          | 0.04                |                     |         |             |               | 0.04                                      | 0.03                   | 0.86                                       |                            |                 |                              |                      |                                 |      |                         |                          |                                      |                    |                    |            |           |
| Pastures without livestock                 | 0.07                     | 0.14                | 0.02                | 0.02    | 0.01        | 0.01          |                                           | 0.07                   |                                            | 0.22                       | 0.04            | 0.03                         | 0.01                 | 0.03                            |      | 0.06                    | 0.06                     | 0.01                                 | 0.15               | 0.02               |            |           |
| Rainfed cereals                            | 0.05                     | 0.09                |                     | 0.01    |             |               |                                           | 0.05                   |                                            |                            | 0.66            | 0.04                         | 0.01                 |                                 |      | 0.03                    |                          |                                      | 0.03               |                    |            |           |
| Rainfed cereals and oilseeds               |                          |                     |                     |         |             |               | 0.03                                      | 0.05                   |                                            |                            | 0.02            | 0.90                         |                      |                                 |      |                         |                          |                                      |                    |                    |            |           |
| Rainfed olive groves                       | 0.02                     |                     |                     | 0.01    |             |               |                                           | 0.08                   |                                            |                            | 0.07            |                              | 0.67                 | 0.03                            |      | 0.02                    |                          | 0.01                                 | 0.04               |                    |            | 0.01      |
| Rainfed olive groves with sheep            | 0.02                     | 0.02                |                     |         |             |               |                                           | 0.03                   |                                            |                            | 0.04            | 0.03                         | 0.06                 | 0.69                            |      |                         |                          | 0.01                                 | 0.05               |                    |            | 0.01      |
| Rice                                       |                          |                     | 0.03                |         |             |               |                                           |                        |                                            |                            |                 |                              |                      |                                 | 0.96 |                         |                          |                                      |                    |                    |            |           |
| Sheep grazing - forages                    | 0.05                     | 0.07                | 0.06                |         |             |               |                                           | 0.05                   |                                            |                            | 0.03            | 0.02                         |                      | 0.01                            |      | 0.61                    |                          |                                      | 0.05               |                    |            |           |
| Sheep grazing - pastures                   | 0.02                     | 0.31                | 0.03                |         |             | 0.02          |                                           | 0.02                   |                                            |                            | 0.02            |                              |                      | 0.03                            |      |                         | 0.39                     | 0.01                                 | 0.09               | 0.01               | 0.01       |           |
| Sheep grazing - pastures and forages       | 0.07                     | 0.29                |                     |         |             |               |                                           | 0.03                   |                                            |                            | 0.02            | 0.02                         |                      |                                 |      |                         |                          | 0.48                                 | 0.04               |                    |            |           |
| Sheep grazing - HO                         |                          | 0.35                |                     |         |             |               |                                           |                        |                                            |                            |                 |                              |                      |                                 |      |                         |                          |                                      | 0.61               |                    |            |           |
| Sheep grazing - CO                         |                          | 0.09                | 0.35                |         |             | 0.02          |                                           |                        |                                            |                            |                 |                              |                      |                                 |      |                         | 0.01                     |                                      | 0.08               | 0.42               |            |           |
| Stone pine                                 |                          | 0.09                | 0.07                |         |             |               |                                           |                        |                                            |                            |                 |                              |                      |                                 |      |                         |                          |                                      |                    |                    | 0.81       |           |
| Vineyards                                  | 0.03                     | 0.11                | 0.01                |         |             |               | 0.02                                      | 0.09                   | 0.01                                       |                            | 0.07            | 0.03                         | 0.01                 | 0.02                            |      |                         |                          |                                      | 0.02               |                    |            | 0.52      |

# Moderate emission scenario (SSP 3-7.0)

| From \ To                                  | Cattle grazing - forages | Cattle grazing - HO | Cattle grazing - CO | Fallows | Fruit trees | Grazing goats | Irrigated cereals and horticultural crops | Irrigated olive groves | Mixed Cattle and sheep - Irrigated forages | Pastures without livestock | Rainfed cereals | Rainfed cereals and oilseeds | Rainfed olive groves | Rainfed olive groves with sheep | Rice | Sheep grazing - forages | Sheep grazing - pastures | Sheep grazing - pastures and forages | Sheep grazing - HO | Sheep grazing - CO | Stone pine | Vineyards |
|--------------------------------------------|--------------------------|---------------------|---------------------|---------|-------------|---------------|-------------------------------------------|------------------------|--------------------------------------------|----------------------------|-----------------|------------------------------|----------------------|---------------------------------|------|-------------------------|--------------------------|--------------------------------------|--------------------|--------------------|------------|-----------|
| Cattle grazing - forages                   | 0.80                     | 0.16                |                     |         |             |               |                                           | 0.02                   |                                            |                            |                 |                              |                      |                                 |      |                         |                          |                                      |                    |                    |            |           |
| Cattle grazing - HO                        | 0.02                     | 0.97                |                     |         |             |               |                                           |                        |                                            |                            |                 |                              |                      |                                 |      |                         |                          |                                      |                    |                    |            |           |
| Cattle grazing - CO                        | 0.05                     | 0.62                | 0.30                |         |             |               |                                           |                        |                                            |                            |                 |                              |                      |                                 |      |                         |                          |                                      |                    |                    |            |           |
| Fallows                                    | 0.06                     | 0.07                |                     | 0.64    |             |               |                                           | 0.07                   |                                            |                            | 0.02            |                              | 0.01                 |                                 |      |                         |                          |                                      | 0.07               |                    | 0.03       |           |
| Fruit trees                                | 0.02                     | 0.05                |                     |         | 0.62        | 0.05          |                                           | 0.05                   | 0.02                                       |                            |                 |                              | 0.01                 | 0.03                            |      |                         | 0.02                     |                                      | 0.03               | 0.02               | 0.04       |           |
| Grazing goats                              | 0.01                     | 0.19                | 0.01                |         |             | 0.61          |                                           |                        |                                            |                            |                 |                              |                      |                                 |      |                         | 0.01                     |                                      | 0.11               |                    | 0.04       |           |
| Irrigated cereals and horticultural crops  | 0.04                     |                     | 0.03                |         |             |               | 0.76                                      | 0.09                   | 0.01                                       |                            |                 | 0.02                         |                      |                                 |      |                         |                          |                                      |                    |                    | 0.01       |           |
| Irrigated olive groves                     | 0.04                     | 0.04                |                     |         |             |               |                                           | 0.91                   |                                            |                            |                 |                              |                      |                                 |      |                         |                          |                                      |                    |                    |            |           |
| Mixed Cattle and sheep - Irrigated forages | 0.07                     | 0.10                | 0.04                |         |             |               |                                           | 0.05                   | 0.70                                       |                            |                 |                              |                      |                                 |      |                         |                          |                                      |                    |                    |            |           |
| Pastures without livestock                 | 0.04                     | 0.18                |                     | 0.05    |             |               |                                           | 0.17                   |                                            | 0.13                       | 0.06            | 0.02                         | 0.03                 | 0.03                            |      | 0.02                    | 0.04                     |                                      | 0.19               |                    |            | 0.01      |
| Rainfed cereals                            | 0.06                     | 0.08                |                     | 0.02    |             |               |                                           | 0.16                   |                                            |                            | 0.58            |                              | 0.02                 |                                 |      | 0.01                    |                          |                                      | 0.04               |                    |            |           |
| Rainfed cereals and oilseeds               |                          |                     |                     |         |             |               |                                           | 0.16                   |                                            |                            | 0.02            | 0.80                         |                      |                                 |      |                         |                          |                                      |                    |                    |            |           |
| Rainfed olive groves                       | 0.02                     |                     |                     | 0.01    |             |               |                                           | 0.20                   |                                            |                            | 0.08            |                              | 0.59                 | 0.01                            |      |                         |                          |                                      | 0.06               |                    |            |           |
| Rainfed olive groves with sheep            | 0.05                     | 0.02                |                     | 0.02    |             | 0.01          |                                           | 0.09                   |                                            |                            | 0.09            |                              | 0.11                 | 0.49                            |      |                         | 0.01                     |                                      | 0.09               |                    |            |           |
| Rice                                       | 0.08                     |                     |                     |         |             |               | 0.01                                      | 0.02                   |                                            |                            |                 |                              |                      |                                 | 0.87 |                         |                          |                                      |                    |                    |            |           |
| Sheep grazing - forages                    | 0.07                     | 0.17                |                     | 0.02    |             |               |                                           | 0.11                   |                                            |                            | 0.05            | 0.03                         | 0.02                 | 0.01                            |      | 0.40                    |                          |                                      | 0.08               |                    |            |           |
| Sheep grazing - pastures                   | 0.05                     | 0.35                | 0.01                | 0.01    |             | 0.03          |                                           | 0.03                   |                                            |                            | 0.02            |                              |                      | 0.03                            |      |                         | 0.27                     |                                      | 0.15               |                    | 0.01       |           |
| Sheep grazing - pastures and forages       | 0.11                     | 0.29                |                     |         |             |               |                                           | 0.09                   |                                            |                            | 0.05            | 0.02                         |                      |                                 |      |                         |                          | 0.35                                 | 0.05               |                    |            |           |
| Sheep grazing - HO                         | 0.02                     | 0.42                |                     |         |             |               |                                           | 0.01                   |                                            |                            |                 |                              |                      |                                 |      |                         |                          |                                      | 0.54               |                    |            |           |
| Sheep grazing - CO                         | 0.01                     | 0.40                | 0.21                |         |             | 0.05          |                                           |                        |                                            |                            |                 |                              |                      |                                 |      |                         |                          |                                      | 0.20               | 0.10               |            |           |
| Stone pine                                 |                          | 0.19                | 0.12                |         |             |               |                                           |                        |                                            |                            |                 |                              |                      |                                 |      |                         |                          |                                      | 0.02               |                    | 0.64       |           |
| Vineyards                                  | 0.06                     | 0.10                |                     | 0.01    |             | 0.01          | 0.01                                      | 0.23                   | 0.01                                       |                            | 0.07            |                              | 0.03                 | 0.02                            |      |                         |                          |                                      | 0.03               |                    |            | 0.37      |

## High emission scenario (SSP 5-8.5)

| From \ To                                  | Cattle grazing - forages | Cattle grazing - HO | Cattle grazing - CO | Fallows | Fruit trees | Grazing goats | Irrigated cereals and horticultural crops | Irrigated olive groves | Mixed Cattle and sheep - Irrigated forages | Pastures without livestock | Rainfed cereals | Rainfed cereals and oilseeds | Rainfed olive groves | Rainfed olive groves with sheep | Rice | Sheep grazing - forages | Sheep grazing - pastures | Sheep grazing - pastures and forages | Sheep grazing - HO | Sheep grazing - CO | Stone pine | Vineyards |
|--------------------------------------------|--------------------------|---------------------|---------------------|---------|-------------|---------------|-------------------------------------------|------------------------|--------------------------------------------|----------------------------|-----------------|------------------------------|----------------------|---------------------------------|------|-------------------------|--------------------------|--------------------------------------|--------------------|--------------------|------------|-----------|
| Cattle grazing - forages                   | 0.80                     | 0.16                |                     |         |             |               |                                           | 0.02                   |                                            |                            |                 |                              |                      |                                 |      |                         |                          |                                      |                    |                    |            |           |
| Cattle grazing - HO                        | 0.03                     | 0.96                |                     |         |             |               |                                           |                        |                                            |                            |                 |                              |                      |                                 |      |                         |                          |                                      |                    |                    |            |           |
| Cattle grazing - CO                        | 0.06                     | 0.69                | 0.23                |         |             |               |                                           |                        |                                            |                            |                 |                              |                      |                                 |      |                         |                          |                                      |                    |                    |            |           |
| Fallows                                    | 0.06                     | 0.07                |                     | 0.61    |             |               |                                           | 0.08                   |                                            |                            | 0.03            | 0.01                         | 0.01                 |                                 |      |                         |                          |                                      | 0.08               |                    | 0.03       |           |
| Fruit trees                                | 0.02                     | 0.07                |                     | 0.02    | 0.58        | 0.05          |                                           | 0.06                   | 0.02                                       |                            | 0.01            |                              | 0.01                 | 0.03                            |      |                         | 0.02                     |                                      | 0.04               | 0.01               | 0.03       |           |
| Grazing goats                              | 0.01                     | 0.22                |                     |         |             | 0.58          |                                           |                        |                                            |                            |                 |                              |                      |                                 |      |                         | 0.01                     |                                      | 0.12               |                    | 0.04       |           |
| Irrigated cereals and horticultural crops  | 0.04                     |                     | 0.03                |         |             |               | 0.76                                      | 0.09                   | 0.01                                       |                            | 0.01            | 0.03                         |                      |                                 |      |                         |                          |                                      |                    |                    |            |           |
| Irrigated olive groves                     | 0.04                     | 0.04                |                     |         |             |               |                                           | 0.90                   |                                            |                            |                 |                              |                      |                                 |      |                         |                          |                                      |                    |                    |            |           |
| Mixed Cattle and sheep - Irrigated forages | 0.08                     | 0.11                | 0.04                |         |             |               | 0.02                                      | 0.07                   | 0.65                                       |                            | 0.01            |                              |                      |                                 |      |                         |                          |                                      |                    |                    |            |           |
| Pastures without livestock                 | 0.04                     | 0.18                |                     | 0.05    |             | 0.01          |                                           | 0.17                   |                                            | 0.13                       | 0.06            | 0.01                         | 0.04                 | 0.03                            |      | 0.01                    | 0.03                     |                                      | 0.20               |                    |            | 0.01      |
| Rainfed cereals                            | 0.06                     | 0.08                |                     | 0.02    |             |               |                                           | 0.17                   |                                            |                            | 0.57            |                              | 0.02                 |                                 |      | 0.01                    |                          |                                      | 0.04               |                    |            |           |
| Rainfed cereals and oilseeds               | 0.01                     |                     |                     |         |             |               |                                           | 0.17                   |                                            |                            | 0.02            | 0.79                         |                      |                                 |      |                         |                          |                                      |                    |                    |            |           |
| Rainfed olive groves                       | 0.02                     |                     |                     | 0.02    |             |               |                                           | 0.19                   |                                            |                            | 0.08            |                              | 0.59                 | 0.01                            |      |                         |                          |                                      | 0.07               |                    |            |           |
| Rainfed olive groves with sheep            | 0.05                     | 0.02                |                     | 0.03    |             | 0.01          |                                           | 0.10                   |                                            |                            | 0.09            |                              | 0.11                 | 0.46                            |      |                         | 0.01                     |                                      | 0.11               |                    |            |           |
| Rice                                       | 0.09                     |                     |                     |         |             |               | 0.02                                      | 0.02                   |                                            |                            |                 |                              |                      |                                 | 0.85 |                         |                          |                                      |                    |                    |            |           |
| Sheep grazing - forages                    | 0.07                     | 0.18                |                     | 0.02    |             |               |                                           | 0.13                   |                                            |                            | 0.07            | 0.03                         | 0.03                 | 0.01                            |      | 0.34                    |                          |                                      | 0.08               |                    |            |           |
| Sheep grazing - pastures                   | 0.05                     | 0.36                |                     | 0.02    |             | 0.03          |                                           | 0.03                   |                                            |                            | 0.03            |                              |                      | 0.02                            |      |                         | 0.24                     |                                      | 0.17               |                    | 0.01       |           |
| Sheep grazing - pastures and forages       | 0.12                     | 0.29                |                     |         |             |               |                                           | 0.09                   |                                            |                            | 0.05            |                              | 0.01                 |                                 |      |                         |                          | 0.34                                 | 0.06               |                    |            |           |
| Sheep grazing - HO                         | 0.02                     | 0.41                |                     |         |             |               |                                           | 0.02                   |                                            |                            |                 |                              |                      |                                 |      |                         |                          |                                      | 0.55               |                    |            |           |
| Sheep grazing - CO                         | 0.01                     | 0.55                | 0.11                |         |             | 0.05          |                                           |                        |                                            |                            |                 |                              |                      |                                 |      |                         |                          |                                      | 0.17               | 0.06               |            |           |
| Stone pine                                 |                          | 0.22                | 0.10                |         |             |               |                                           |                        |                                            |                            |                 |                              |                      |                                 |      |                         |                          |                                      | 0.02               |                    | 0.63       |           |
| Vineyards                                  | 0.08                     | 0.09                |                     | 0.01    |             |               | 0.02                                      | 0.27                   | 0.01                                       |                            | 0.08            |                              | 0.04                 | 0.02                            |      |                         |                          |                                      | 0.04               |                    |            | 0.32      |
